# Supplementary material for: High Blood Pressure and Its Association With Incident Diabetes Over 10 Years in the Korean Genome and Epidemiology Study (KoGES)
Source: Oxford University Press journal article supplement (doi:10.2337/dc14-1931), 2015-05-18
Supplement: dc141931supplementarydata.pdf [file dc141931supplementarydata.pdf]

SUPPLEMENTARY DATA

**Supplementary Table 1. Percentages of subjects who used different antihypertensive (anti-HT) medications**

|                                               | N   | Percentage         |
|-----------------------------------------------|-----|--------------------|
| Subjects using anti-HT medication at baseline | 381 | 4.4%*              |
| <i>Type of HT medication</i> <sup>†</sup>     |     |                    |
| Calcium channel blockers                      | 141 | 37.0% <sup>†</sup> |
| ACE inhibitors or ARBs                        | 83  | 21.8% <sup>†</sup> |
| Diuretics                                     | 47  | 12.3% <sup>†</sup> |
| β-blockers                                    | 42  | 11.0% <sup>†</sup> |
| Unknown                                       | 116 | 30.4% <sup>†</sup> |

\*Percentage calculated based on 8740 study participants.

<sup>†</sup>Percentage calculated based on 381 subjects who used anti-HT medication (subjects who used two drugs were counted separately).

SUPPLEMENTARY DATA

**Supplementary Table 2. Cox Proportional Hazards Model for Multiple Parameters to Assess the Association Between Blood Pressure and Incidence of Diabetes Mellitus**

|                                        | HR   | 95.0% CI |       | P     |
|----------------------------------------|------|----------|-------|-------|
|                                        |      | Lower    | Upper |       |
| Age (years)                            | 1.01 | 1.01     | 1.02  | <0.01 |
| Gender (men vs. women)                 | 0.97 | 0.82     | 1.15  | 0.73  |
| Center: <i>Ansung</i> vs. <i>Ansan</i> | 1.55 | 1.35     | 1.80  | <0.01 |
| <i>Smoking status</i>                  |      |          |       |       |
| Current vs. ex- or nonsmoker           | 1.56 | 1.33     | 1.82  | <0.01 |
| <i>Exercise habit</i>                  |      |          |       |       |
| Regular vs. no or irregular            | 0.92 | 0.81     | 1.05  | 0.20  |
| <i>Alcohol consumption</i>             |      |          |       |       |
| Heavy vs. moderate                     | 1.05 | 0.89     | 1.23  | 0.58  |
| Waist circumference (cm)               | 1.01 | 1.01     | 1.02  | <0.05 |
| <i>Family history of DM</i>            |      |          |       |       |
| Yes vs. no                             | 1.38 | 1.17     | 1.64  | <0.01 |
| HbA1c (%)                              | 3.30 | 2.87     | 3.79  | <0.01 |
| HDL-cholesterol (mg/dl)                | 0.99 | 0.99     | 1.00  | <0.01 |
| Triglycerides (mg/dl)                  | 1.01 | 1.00     | 1.01  | <0.05 |
| ALT (mg/dl)                            | 1.01 | 1.00     | 1.01  | <0.01 |
| hsCRP (mg/l)                           | 1.09 | 0.97     | 1.15  | 0.11  |
| Fasting glucose (mg/dl)                | 1.03 | 1.02     | 1.03  | <0.01 |
| Postload 2-h glucose (mg/dl)           | 1.02 | 1.02     | 1.02  | <0.01 |
| HOMA-IR                                | 0.97 | 0.91     | 1.03  | 0.30  |
| Insulinogenic index                    | 0.99 | 0.98     | 1.01  | 0.92  |
| <i>Lipid-lowering agents</i>           |      |          |       |       |
| Yes vs. no                             | 1.27 | 0.71     | 2.27  | 0.41  |
| <i>Hypertension</i>                    |      |          |       |       |
| Prehypertension vs. normal             | 1.23 | 1.06     | 1.42  | <0.01 |
| Stage 1 hypertension vs. normal        | 1.26 | 1.04     | 1.54  | <0.05 |
| Stage 2 hypertension vs. normal        | 1.60 | 1.30     | 1.96  | <0.01 |

ALT, alanine aminotransferase; HOMA-IR = fasting plasma insulin ( $\mu$ IU/ml) x fasting plasma glucose (mg/dl) / 405; Insulinogenic index = 60–0 min insulin (IU/ml)/60–0 min glucose (mmol/l)
